# Supplementary material
Source: MDPI journal article supplement (https://www.mdpi.com/2073-4395/13/8/2089)
Supplement: s1 [file s1]

*Supplementary Materials*

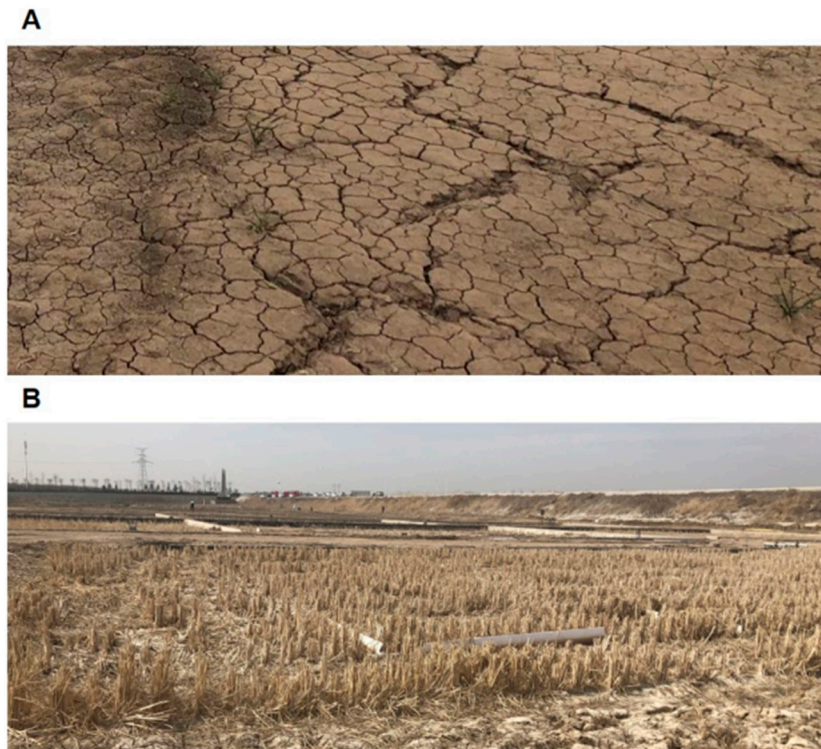

**Figure S1.** Sampling sites of the non-rice region (A) and sea rice field (B) on the coastal beach of Jiaozhou Bay. Fresh topsoil samples (2-20 cm) were taken for three replicates from each region

**Table S1.** GenBank accession No. of the isolated proteinase-producing bacterial strains.

| Bacterial strains | GenBank accession No. | Bacterial strains | GenBank accession No. |
|-------------------|-----------------------|-------------------|-----------------------|
| G2-7a             | OQ651246              | G2-12             | OQ619104              |
| G3-5              | OQ619129              | E1-3              | OQ618953              |
| G1-1              | OQ619088              | G1-5              | OQ619092              |
| G1-3b             | OQ619111              | E1-12b            | OQ618963              |
| G3-4b             | OQ619130              | E3-14             | OQ618983              |
| G3-4a             | OQ619123              | E1-14             | OQ619010              |
| G3-2              | OQ619128              | E2-1b             | OQ619030              |
| G1-10             | OQ619118              | E1-1a             | OQ618950              |
| E2-1              | OQ618975              | E2-10             | OQ619029              |
| E3-3              | OQ619027              | E1-5              | OQ618955              |
| E2-2              | OQ619011              | E1-23             | OQ619028              |
| E1-24             | OQ618972              | G1-17             | OQ619113              |
| G1-7              | OQ619094              | E2-4              | OQ619002              |
| E2-6              | OQ618976              | E3-12             | OQ619025              |
| E1-2              | OQ618952              | E1-21             | OQ618970              |
| E1-9              | OQ618961              | E1-7              | OQ618958              |
| E1-8              | OQ618960              | G1-2b             | OQ619090              |

|       |          |        |          |
|-------|----------|--------|----------|
| E3-15 | OQ618984 | E1-27  | OQ618974 |
| G1-3a | OQ619091 | E3-9   | OQ618981 |
| E3-6  | OQ619005 | G2-4   | OQ619119 |
| G1-13 | OQ619097 | G3-13  | OQ619116 |
| G2-7b | OQ619114 | E3-11  | OQ618982 |
| G1-8  | OQ619095 | E1-12a | OQ618962 |
| E2-8  | OQ618977 | E1-1b  | OQ618951 |
| E1-4  | OQ618954 | G2-14  | OQ619115 |
| E3-13 | OQ619003 | E2-13  | OQ619032 |
| G2-15 | OQ619105 | E3-20b | OQ619031 |
| E1-6  | OQ618956 | G1-11  | OQ619096 |
| G3-9  | OQ619108 | G2-11  | OQ619103 |
| E3-5  | OQ618980 | G2-10d | OQ619102 |
| E1-19 | OQ618969 | E3-18  | OQ618985 |
| E1-22 | OQ618971 | E1-25  | OQ618973 |
| E1-13 | OQ618964 | G1-6   | OQ619093 |
| E1-22 | OQ618971 | E3-20c | OQ619001 |

**Table S2.** The potential proteolytic activity of the top 50 abundant genera of the sea rice soils.

| No. of abundance | Genera                                                                                                                                                                                                                                                                                                        | Representative proteinase-producing strain | Reference <sup>1</sup> |
|------------------|---------------------------------------------------------------------------------------------------------------------------------------------------------------------------------------------------------------------------------------------------------------------------------------------------------------|--------------------------------------------|------------------------|
| 1                | <i>Lysobacter</i>                                                                                                                                                                                                                                                                                             | <i>Lysobacter capsici</i> VKM B-2533T      | [22]                   |
| 2-5              | <i>Thiobacillus</i> ,<br><i>Antarcticibacterium</i> ,<br><i>Sphingomonas</i> , <i>Salinimicrobium</i>                                                                                                                                                                                                         | — <sup>2</sup>                             |                        |
| 6                | <i>Pontibacter</i>                                                                                                                                                                                                                                                                                            | <i>Pontibacter</i> spp.                    | [23]                   |
| 7-20             | <i>Gemmatimonas</i> , <i>Ellin6067</i> ,<br><i>RB41</i> , <i>Gillisia</i> ,<br><i>Zeaxanthinibacter</i> , <i>MND1</i> ,<br><i>Erythrobacter</i> , <i>Intrasporangium</i> ,<br><i>UTBCD1</i> , <i>Cesiribacter</i> ,<br><i>Ilumatobacter</i> , <i>Ramlibacter</i> ,<br><i>Sphingorhabdus</i> , <i>Azoarcus</i> | —                                          |                        |
| 21               | <i>Arthrobacter</i> <sup>3</sup>                                                                                                                                                                                                                                                                              | <i>Arthrobacter</i> sp. CW01               | [24]                   |
| 22-23            | <i>Massilia</i> , <i>Brevundimonas</i>                                                                                                                                                                                                                                                                        |                                            |                        |
| 24               | <i>Pseudomonas</i>                                                                                                                                                                                                                                                                                            | <i>Pseudomonas aeruginosa</i>              | [25]                   |

|       |                                    |                                   |      |
|-------|------------------------------------|-----------------------------------|------|
| 25    | <i>Bryobacter</i>                  | —                                 |      |
| 26    | <i>Flavisolibacter</i>             | —                                 |      |
|       | <i>Marmoricola, Haliangium,</i>    |                                   |      |
| 27-32 | <i>Nitrospira, BIyi10,</i>         | —                                 |      |
|       | <i>Subgroup_10, Adhaeribacter</i>  |                                   |      |
| 33    | <b><i>Bacillus</i></b>             | <i>Bacillus subtilis</i>          | [26] |
|       | <i>Arenimonas, Subsaxibacter,</i>  |                                   |      |
| 34-38 | <i>Silicimonas, Gaiella,</i>       | —                                 |      |
|       | <i>Anaeromyxobacter</i>            |                                   |      |
| 39    | <b><i>Streptomyces</i></b>         | <i>Streptomyces</i> sp. M30       | [27] |
|       | <i>Candidatus_Solibacter,</i>      |                                   |      |
| 40-42 | <i>Gallionella, Tropicimonas</i>   | —                                 |      |
| 43    | <b><i>Planococcus</i></b>          | <i>Planococcus</i> sp. CGMCC 8088 | [28] |
|       | <i>Hoeflea, Aequorivita,</i>       |                                   |      |
| 44-49 | <i>Motiliproteus, Anaerolinea,</i> | —                                 |      |
|       | <i>Devosia, Blastocatella</i>      |                                   |      |
| 50    | <b><i>Nocardioideis</i></b>        | —                                 |      |

<sup>1</sup> The genera has been previously reported with the proteinase-producing strains.

<sup>2</sup> Not reported.

<sup>3</sup> The genera in bold fonts were isolated as proteinase-producing bacteria in this research.

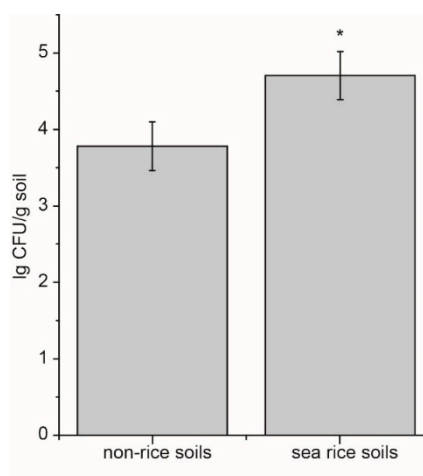

**Figure S2.** The number of proteinase-producing bacteria in sea rice soils and in none-rice soils estimated by the colony-counting method. The graph is a representative of at least three repeats. Black \* indicates significance of differences between the reference and sea rice soils at  $P < 0.05$ .

**Table S3.** H/C ratio of the cultivable strains on protein substrate plates.

| Genera                    | Strains | H/C ratio <sup>1</sup> |        |         |
|---------------------------|---------|------------------------|--------|---------|
|                           |         | Milk Powder            | Casein | Gelatin |
| <i>Alkalihalobacillus</i> | G2-7a   | 4.23                   | 4.00   | 4.50    |
|                           | G3-5    | 6.58                   | 6.46   | 4.00    |
|                           | G1-1    | 2.91                   | 3.40   | 2.00    |

|                       |       |      |      |      |
|-----------------------|-------|------|------|------|
|                       | G1-3b | 2.50 | 1.85 | 1.73 |
|                       | G3-4b | 5.38 | 4.60 | 5.54 |
|                       | G3-4a | 4.54 | 5.91 | 3.45 |
|                       | G3-2  | 5.40 | 7.45 | 6.08 |
|                       | G1-10 | 2.92 | 2.43 | 2.23 |
|                       | E2-1  | 3.90 | 4.00 | 5.55 |
|                       | E3-3  | 3.00 | 2.93 | 3.38 |
|                       | E2-2  | 3.64 | 2.83 | 2.73 |
| <i>Arthrobacter</i>   | E1-24 | 2.22 | -    | 2.43 |
| <i>Bacillus</i>       | G1-7  | 3.13 | 4.17 | 2.63 |
|                       | E2-6  | 4.36 | 5.17 | 4.78 |
|                       | E1-2  | 3.06 | 3.00 | 4.15 |
|                       | E1-9  | 4.11 | 3.07 | 5.78 |
|                       | E1-8  | 3.36 | 3.71 | 2.60 |
|                       | E3-15 | 4.67 | 2.67 | 4.25 |
| <i>Brevibacterium</i> | G1-3a | 1.44 | 2.06 | 2.20 |
|                       | E3-6  | 2.26 | 1.80 | 4.63 |
|                       | E1-3  | 1.77 | 1.53 | -    |

(to continue)

**Table S3. Cont.**

| Genera                   | Strains | H/C ratio   |        |         |
|--------------------------|---------|-------------|--------|---------|
|                          |         | Milk Powder | Casein | Gelatin |
| <i>Fictibacillus</i>     | E2-8    | 3.60        | 1.73   | -       |
|                          | G1-13   | 4.40        | 3.00   | 2.00    |
|                          | G2-7b   | 2.33        | 3.17   | 3.40    |
|                          | G1-8    | 2.86        | 3.13   | 3.20    |
| <i>Halobacillus</i>      | G2-12   | 3.50        | 2.50   | 1.32    |
|                          | E3-11   | 3.78        | 1.78   | -       |
| <i>Lysinibacillus</i>    | E1-4    | 3.50        | 2.32   | 2.89    |
| <i>Mesobacillus</i>      | E3-13   | 2.67        | 1.75   | 2.07    |
| <i>Metaplanococcus</i>   | E1-18   | 4.91        | 2.00   | -       |
| <i>Nocardioides</i>      | G2-15   | 3.80        | 3.57   | 1.29    |
|                          | E1-6    | 4.83        | 5.11   | -       |
| <i>Oceanobacillus</i>    | G3-9    | 1.82        | 2.93   | -       |
| <i>Paenibacillus</i>     | E3-5    | 2.09        | 2.24   | 2.88    |
| <i>Paenisporosarcina</i> | E1-19   | 6.00        | 3.56   | 8.50    |
| <i>Paracoccus</i>        | E1-22   | -           | -      | 1.20    |
| <i>Planococcus</i>       | G1-5    | 3.20        | 3.00   | -       |
|                          | E1-12b  | 4.21        | 2.88   | -       |
|                          | E3-14   | 6.78        | 3.00   | 1.43    |
|                          | E1-14   | 4.56        | 3.36   | 4.67    |
|                          | E2-1b   | 5.20        | 4.00   | 2.45    |

|                     |        |      |      |      |
|---------------------|--------|------|------|------|
|                     | E1-1a  | 4.15 | 4.08 | 2.75 |
|                     | E2-10  | 2.79 | 3.73 | 1.19 |
|                     | E1-5   | 3.14 | 1.89 | -    |
|                     | E1-23  | 3.90 | 4.56 | -    |
| <i>Priestia</i>     | G1-17  | 3.57 | 1.62 | 4.00 |
|                     | E2-4   | 2.50 | 2.60 | 2.46 |
|                     | E3-12  | 3.30 | 4.29 | 3.64 |
|                     | E1-21  | 2.81 | 4.56 | 4.78 |
| <i>Priestia</i>     | E1-7   | 2.50 | 3.19 | 4.70 |
| <i>Pseudomonas</i>  | G1-2b  | 6.54 | 7.33 | 5.29 |
|                     | E1-27  | 4.55 | 4.00 | 3.64 |
|                     | E3-9   | 3.88 | 2.53 | 2.54 |
| <i>Rosellomorea</i> | G2-4   | 2.75 | 2.79 | 2.78 |
|                     | G1-6   | 3.46 | 3.44 | 2.77 |
|                     | G3-13  | 1.30 | 1.34 | 1.67 |
|                     | E1-13  | 4.90 | 4.18 | -    |
|                     | E1-12a | 3.18 | 4.00 | 3.60 |
|                     | E1-1b  | 2.62 | 4.36 | 5.82 |
| <i>Shigella</i>     | G2-14  | 1.73 | 1.45 | 2.28 |
|                     | E2-13  | 2.17 | 2.64 | 4.00 |
|                     | E3-20c | 3.50 | 1.82 | -    |
|                     | E3-20b | 3.33 | -    | 2.63 |
|                     | G1-11  | -    | -    | 1.45 |
| <i>Streptomyces</i> | G2-11  | 2.75 | 1.93 | 2.19 |
|                     | G2-10d | -    | -    | 1.89 |
|                     | E3-18  | 2.00 | -    | 2.10 |
|                     | E1-25  | 1.43 | 3.64 | 4.57 |

<sup>1</sup> Each data is a representative of at least three repeats.
